# Supplementary material
Source: Research Square preprint supplement (doi:10.21203/rs.3.rs-9737821/v1)
Supplement: Supplementary file 1 [file 2abde509a54148e2e6f43c2b.xlsx]

## Sheet: Sheet1
Supplementary Table S1 | Public data resources used in this study
Resource	Version / Accession	Samples / Entries	Key data items	Purpose in this study
Genomics of Drug Sensitivity in Cancer (GDSC2)	Release v2-8.4 (Dec 2023)	1 912 cancer cell lines × 397 compounds	ln(IC₅₀), AUC, full dose–response curves	Define resistant vs sensitive groups and create “drug–cancer” response labels
Cancer Cell Line Encyclopedia (CCLE)	DepMap 24Q1 RNA-seq	1 455 cell-line count matrices	Raw counts, TPM values, gene annotation	Provide matched transcriptomes for GDSC2 lines; differential expression and REO construction
Cancer Therapeutics Response Portal (CTRP)	Release v2	887 cell lines × 545 compounds	AUC values	Independent internal validation of RF models with matched CCLE expression
Gene Expression Omnibus (GEO)	Bulk RNA-seq / microarray: GSE38376	18 lapatinib-treated breast-cancer samples (Illumina BeadChip)	Log₂-transformed intensities	External bulk-scale transfer validation and small-sample retraining
	Single-cell RNA-seq: GSE156246	36 651 cells (10 × Genomics)	UMI count matrices	Pseudo-bulk REO generation; evaluation of clonal resistance dynamics
Note. For microarray datasets, probes mapping to multiple genes or to none were discarded; when multiple probes mapped to the same gene, their expression values were averaged to yield one final signal per gene.
