# Supplementary material
Source: Research Square preprint supplement (doi:10.21203/rs.3.rs-9737821/v1)
Supplement: Supplementary file 2 [file 3e320228af4621ee4382afba.xlsx]

## Sheet: Drug Response Related-GO Terms
Supplementary Table S3A | Drug-response relevance of the eight high-frequency GO terms (with literature support)
GO term	Pharmacological implication for resistance / sensitivity	Strongly correlated evidence (PMID)
Glycosaminoglycan binding	Glycosaminoglycans (e.g. heparan sulfate, hyaluronan) bind to CD44 or integrins, trigger PI3K-Akt signalling and up-regulate ABC transporters, thereby shielding tumour cells from cytotoxic agents; heparanase inhibition restores drug penetration.	①Heparanase blockade sensitises pancreatic cancer to gemcitabine (PMID：16959970) ②Hyaluronan-CD44 signalling drives P-gp-mediated multidrug resistance (PMID：34116638)
Extracellular matrix organisation	Collagen cross-linking and matrix stiffening restrict drug diffusion and activate FAK/Src pathways that protect stem-like clones; lysyl-oxidase or MMP inhibitors enhance platin/etoposide efficacy.	Review of ECM remodelling as a convergent driver of metastasis and chemoresistance (PMID：31028852)
Extracellular structure organisation	Remodelling of fibrillar ECM and basement membrane builds “tracks’’ that facilitate migration of residual cells under drug pressure, favouring relapse.	Oriented ECM fibres predict melanoma and breast-cancer recurrence after therapy (PMID：37928063)
External encapsulating structure organisation	Reassembly of pericellular coats or basement membrane thickening forms a dense barrier that slows hydrophilic-drug entry and preserves stem-cell niches.	External encapsulating structure gene set persistently enriched in chemotherapy-tolerant residual clones (MSigDB record M40442).
Cytokine activity	IL-6/8, CXCL12 and related cytokines activate NF-κB or JAK-STAT, enhance anti-apoptotic signalling and induce ABC pumps, conferring cross-resistance to both targeted agents and classical cytotoxics.	Cytokine-driven tyrosine-kinase-inhibitor resistance in breast cancer (PMID：30243719)
Regulation of membrane potential	Drug-resistant cells often display membrane depolarisation and lipid re-distribution, which affect drug uptake/efflux; pharmacological K⁺/Na⁺-channel blockers can partially reverse resistance.	Biophysical alterations of the plasma membrane during anticancer-drug resistance (PMID：24121320)
T-cell chemotaxis	Down-regulation of CXCL9-11 or CCL5 impairs CTL infiltration, creating an “immune-excluded’’ phenotype that diminishes chemo- and immunotherapy efficacy; restoring these signals resensitises tumours.	Oxaliplatin up-regulates CXCL10 and improves CAR-T and anti-PD-L1 responses (PMID：33147450)
Organic acid transport	Altered expression of OAT/OATP/BCRP family members modulates intracellular exposure to methotrexate, statins, taxanes, etc.; loss-of-function variants strongly associate with poor drug accumulation and resistance.	Cooperative role of OATP2B1 and BCRP in rosuvastatin disposition (PMID：38857856)

## Sheet: every-condition
Supplementary Table S3B | GO entries enriched in each drug-cancer combination
ID	ONTOLOGY	Description	Duplicate_Count	Conditions
GO:0005539	MF	glycosaminoglycan binding	7	Vinblastine_COREAD, Tanespimycin_COREAD, Tanespimycin_SKCM, Mitoxantrone_COREAD, Ulixertinib_COREAD, N25720-51-A1_COREAD, Vinorelbine_LUAD
GO:0030198	BP	extracellular matrix organization	7	Lestaurtinib_SCLC, Staurosporine_BRCA, Wee1 Inhibitor_BRCA, Nutlin-3a (-)_COREAD, Osimertinib_BRCA, Sepantronium bromide_SCLC, N25720-51-A1_COREAD
GO:0043062	BP	extracellular structure organization	7	Lestaurtinib_SCLC, Staurosporine_BRCA, Wee1 Inhibitor_BRCA, Nutlin-3a (-)_COREAD, Osimertinib_BRCA, Sepantronium bromide_SCLC, N25720-51-A1_COREAD
GO:0045229	BP	external encapsulating structure organization	7	Lestaurtinib_SCLC, Staurosporine_BRCA, Wee1 Inhibitor_BRCA, Nutlin-3a (-)_COREAD, Osimertinib_BRCA, Sepantronium bromide_SCLC, N25720-51-A1_COREAD
GO:0005125	MF	cytokine activity	6	Tanespimycin_COREAD, Irinotecan_OV, Teniposide_LUAD, Mitoxantrone_COREAD, Dactinomycin_COREAD, 776928_COREAD
GO:0042391	BP	regulation of membrane potential	5	Vinblastine_COREAD, Navitoclax_LUAD, Elephantin_ESCA, Buparlisib_COREAD, LJI308_SKCM
GO:0010720	BP	positive regulation of cell development	4	Obatoclax Mesylate_COREAD, MN-64_GBM, Vinorelbine_LUAD, VE821_BRCA
GO:0010818	BP	T cell chemotaxis	4	Mitoxantrone_COREAD, Dactinomycin_COREAD, 776928_COREAD, OF-1_SKCM
GO:0015849	BP	organic acid transport	4	AZD8055_LUAD, Dactinomycin_COREAD, Elephantin_ESCA, N25720-51-A1_COREAD
GO:0045177	CC	apical part of cell	4	Tanespimycin_SKCM, Nutlin-3a (-)_COREAD, AZD8055_LUAD, Elephantin_COREAD
GO:0046942	BP	carboxylic acid transport	4	AZD8055_LUAD, Dactinomycin_COREAD, Elephantin_ESCA, N25720-51-A1_COREAD
GO:0048738	BP	cardiac muscle tissue development	4	Veliparib_DLBC, MN-64_LUAD, Osimertinib_BRCA, Sepantronium bromide_SCLC
GO:0051580	BP	regulation of neurotransmitter uptake	4	Tanespimycin_LUAD, Staurosporine_BRCA, LJI308_SKCM, PFI-1_ESCA
GO:0051924	BP	regulation of calcium ion transport	4	Tanespimycin_LUAD, Dactinomycin_COREAD, Vinorelbine_LUAD, LJI308_SKCM
GO:0097060	CC	synaptic membrane	4	Selumetinib_SKCM, Elephantin_COREAD, N25720-51-A1_COREAD, CT7033-2_COREAD
GO:0002009	BP	morphogenesis of an epithelium	3	Osimertinib_BRCA, Sepantronium bromide_SCLC, VE821_BRCA
GO:0002237	BP	response to molecule of bacterial origin	3	Axitinib_SCLC, Mitoxantrone_COREAD, Vinorelbine_LUAD
GO:0002274	BP	myeloid leukocyte activation	3	Podophyllotoxin bromide_ESCA, Telomerase Inhibitor IX_BRCA, LJI308_SKCM
GO:0002444	BP	myeloid leukocyte mediated immunity	3	Axitinib_SCLC, Podophyllotoxin bromide_ESCA, Telomerase Inhibitor IX_BRCA
GO:0002548	BP	monocyte chemotaxis	3	Mitoxantrone_COREAD, 776928_COREAD, MG-132_COREAD
GO:0003205	BP	cardiac chamber development	3	MN-64_LUAD, Osimertinib_BRCA, Sepantronium bromide_SCLC
GO:0003206	BP	cardiac chamber morphogenesis	3	MN-64_LUAD, Osimertinib_BRCA, Sepantronium bromide_SCLC
GO:0005796	CC	Golgi lumen	3	Tanespimycin_SKCM, AZD8055_LUAD, AZD3759_LUAD
GO:0006813	BP	potassium ion transport	3	Tanespimycin_LUAD, Pyridostatin_SKCM, LJI308_SKCM
GO:0007188	BP	adenylate cyclase-modulating G protein-coupled receptor signaling pathway	3	Lestaurtinib_SCLC, LJI308_SKCM, VE821_BRCA
GO:0007389	BP	pattern specification process	3	Camptothecin_ESCA, Osimertinib_BRCA, Sepantronium bromide_SCLC
GO:0007411	BP	axon guidance	3	Lestaurtinib_SCLC, Sepantronium bromide_SCLC, CPI-637_COREAD
GO:0007517	BP	muscle organ development	3	MN-64_LUAD, Osimertinib_BRCA, Sepantronium bromide_SCLC
GO:0007611	BP	learning or memory	3	Elephantin_ESCA, LJI308_SKCM, PFI-1_ESCA
GO:0009615	BP	response to virus	3	Mitoxantrone_COREAD, MG-132_COREAD, Vinorelbine_LUAD
GO:0016324	CC	apical plasma membrane	3	Tanespimycin_SKCM, AZD8055_LUAD, Elephantin_COREAD
GO:0030178	BP	negative regulation of Wnt signaling pathway	3	Staurosporine_BRCA, Wee1 Inhibitor_BRCA, Osimertinib_BRCA
GO:0031069	BP	hair follicle morphogenesis	3	Docetaxel_LUAD, BI-2536_LUAD, Osimertinib_BRCA
GO:0032496	BP	response to lipopolysaccharide	3	Axitinib_SCLC, Mitoxantrone_COREAD, Vinorelbine_LUAD
GO:0043270	BP	positive regulation of monoatomic ion transport	3	Tanespimycin_LUAD, 776928_COREAD, LJI308_SKCM
GO:0045211	CC	postsynaptic membrane	3	AZD8055_LUAD, CT7033-2_COREAD, 5-azacytidine_LUAD
GO:0045785	BP	positive regulation of cell adhesion	3	Axitinib_SCLC, Nutlin-3a (-)_COREAD, VE821_BRCA
GO:0048608	BP	reproductive structure development	3	Axitinib_SCLC, MK-2206_COREAD, Sepantronium bromide_SCLC
GO:0048730	BP	epidermis morphogenesis	3	Docetaxel_LUAD, BI-2536_LUAD, Osimertinib_BRCA
GO:0050729	BP	positive regulation of inflammatory response	3	Lenalidomide_ESCA, Axitinib_SCLC, Vinorelbine_LUAD
GO:0050863	BP	regulation of T cell activation	3	Lenalidomide_ESCA, Telomerase Inhibitor IX_BRCA, Vinorelbine_LUAD
GO:0050900	BP	leukocyte migration	3	Camptothecin_ESCA, Lenalidomide_ESCA, Axitinib_SCLC
GO:0051279	BP	regulation of release of sequestered calcium ion into cytosol	3	Vinblastine_COREAD, Mitoxantrone_COREAD, 5-azacytidine_COREAD
GO:0055008	BP	cardiac muscle tissue morphogenesis	3	MN-64_LUAD, Osimertinib_BRCA, N25720-51-A1_COREAD
GO:0061458	BP	reproductive system development	3	Axitinib_SCLC, MK-2206_COREAD, Sepantronium bromide_SCLC
GO:0071219	BP	cellular response to molecule of bacterial origin	3	Axitinib_SCLC, Mitoxantrone_COREAD, Vinorelbine_LUAD
GO:0071222	BP	cellular response to lipopolysaccharide	3	Axitinib_SCLC, Mitoxantrone_COREAD, Vinorelbine_LUAD
GO:0072678	BP	T cell migration	3	Mitoxantrone_COREAD, Dactinomycin_COREAD, 776928_COREAD
GO:0090025	BP	regulation of monocyte chemotaxis	3	Mitoxantrone_COREAD, Dactinomycin_COREAD, 776928_COREAD
GO:0090026	BP	positive regulation of monocyte chemotaxis	3	Axitinib_SCLC, Mitoxantrone_COREAD, 776928_COREAD
GO:0097485	BP	neuron projection guidance	3	Lestaurtinib_SCLC, Sepantronium bromide_SCLC, CPI-637_COREAD
GO:1903037	BP	regulation of leukocyte cell-cell adhesion	3	Lenalidomide_ESCA, Telomerase Inhibitor IX_BRCA, Vinorelbine_LUAD
GO:2000406	BP	positive regulation of T cell migration	3	Mitoxantrone_COREAD, Dactinomycin_COREAD, 776928_COREAD
GO:0001906	BP	cell killing	2	Axitinib_SCLC, Telomerase Inhibitor IX_BRCA
GO:0001909	BP	leukocyte mediated cytotoxicity	2	Axitinib_SCLC, Telomerase Inhibitor IX_BRCA
GO:0002687	BP	positive regulation of leukocyte migration	2	Axitinib_SCLC, 776928_COREAD
GO:0002690	BP	positive regulation of leukocyte chemotaxis	2	Axitinib_SCLC, 776928_COREAD
GO:0002696	BP	positive regulation of leukocyte activation	2	Telomerase Inhibitor IX_BRCA, Vinorelbine_LUAD
GO:0003012	BP	muscle system process	2	Lestaurtinib_SCLC, MN-64_LUAD
GO:0003231	BP	cardiac ventricle development	2	MN-64_LUAD, VE821_BRCA
GO:0006816	BP	calcium ion transport	2	Vinorelbine_LUAD, LJI308_SKCM
GO:0006837	BP	serotonin transport	2	PLX-4720_SKCM, LJI308_SKCM
GO:0006936	BP	muscle contraction	2	Lestaurtinib_SCLC, MN-64_LUAD
GO:0007159	BP	leukocyte cell-cell adhesion	2	Lenalidomide_ESCA, Vinorelbine_LUAD
GO:0007189	BP	adenylate cyclase-activating G protein-coupled receptor signaling pathway	2	Lestaurtinib_SCLC, LJI308_SKCM
GO:0007409	BP	axonogenesis	2	N25720-51-A1_COREAD, CPI-637_COREAD
GO:0007565	BP	female pregnancy	2	AZD8055_LUAD, 5-azacytidine_COREAD
GO:0007613	BP	memory	2	Elephantin_ESCA, LJI308_SKCM
GO:0007632	BP	visual behavior	2	Navitoclax_LUAD, Nutlin-3a (-)_SKCM
GO:0008542	BP	visual learning	2	Navitoclax_LUAD, Nutlin-3a (-)_SKCM
GO:0009410	BP	response to xenobiotic stimulus	2	Wee1 Inhibitor_BRCA, AZD8055_LUAD
GO:0010959	BP	regulation of metal ion transport	2	Vinorelbine_LUAD, LJI308_SKCM
GO:0010975	BP	regulation of neuron projection development	2	Obatoclax Mesylate_COREAD, Osimertinib_BRCA
GO:0014820	BP	tonic smooth muscle contraction	2	PLX-4720_SKCM, POMHEX_COREAD
GO:0015844	BP	monoamine transport	2	Tanespimycin_LUAD, LJI308_SKCM
GO:0021988	BP	olfactory lobe development	2	Methotrexate_BRCA, 743380_BRCA
GO:0022409	BP	positive regulation of cell-cell adhesion	2	Telomerase Inhibitor IX_BRCA, Vinorelbine_LUAD
GO:0030509	BP	BMP signaling pathway	2	Axitinib_SCLC, Sepantronium bromide_SCLC
GO:0030510	BP	regulation of BMP signaling pathway	2	Axitinib_SCLC, Sepantronium bromide_SCLC
GO:0030595	BP	leukocyte chemotaxis	2	Axitinib_SCLC, Nutlin-3a (-)_SKCM
GO:0032102	BP	negative regulation of response to external stimulus	2	Lenalidomide_ESCA, Vinorelbine_LUAD
GO:0032946	BP	positive regulation of mononuclear cell proliferation	2	776928_COREAD, Mycophenolic acid_COREAD
GO:0034762	BP	regulation of transmembrane transport	2	Tanespimycin_LUAD, 5-azacytidine_COREAD
GO:0034765	BP	regulation of monoatomic ion transmembrane transport	2	Tanespimycin_LUAD, Vinorelbine_LUAD
GO:0042063	BP	gliogenesis	2	Staurosporine_BRCA, MK-2206_COREAD
GO:0042102	BP	positive regulation of T cell proliferation	2	776928_COREAD, Mycophenolic acid_COREAD
GO:0043269	BP	regulation of monoatomic ion transport	2	Tanespimycin_LUAD, LJI308_SKCM
GO:0043271	BP	negative regulation of monoatomic ion transport	2	Methotrexate_SKCM, LJI308_SKCM
GO:0043583	BP	ear development	2	Sepantronium bromide_SCLC, N25720-51-A1_COREAD
GO:0044703	BP	multi-organism reproductive process	2	AZD8055_LUAD, 5-azacytidine_COREAD
GO:0044706	BP	multi-multicellular organism process	2	AZD8055_LUAD, 5-azacytidine_COREAD
GO:0048644	BP	muscle organ morphogenesis	2	MN-64_LUAD, Osimertinib_BRCA
GO:0050671	BP	positive regulation of lymphocyte proliferation	2	776928_COREAD, Mycophenolic acid_COREAD
GO:0050727	BP	regulation of inflammatory response	2	Lenalidomide_ESCA, Vinorelbine_LUAD
GO:0050767	BP	regulation of neurogenesis	2	Osimertinib_BRCA, Sepantronium bromide_SCLC
GO:0050769	BP	positive regulation of neurogenesis	2	Osimertinib_BRCA, VE821_BRCA
GO:0050867	BP	positive regulation of cell activation	2	Telomerase Inhibitor IX_BRCA, Vinorelbine_LUAD
GO:0050870	BP	positive regulation of T cell activation	2	Telomerase Inhibitor IX_BRCA, Vinorelbine_LUAD
GO:0050890	BP	cognition	2	Navitoclax_LUAD, Elephantin_ESCA
GO:0051048	BP	negative regulation of secretion	2	Teniposide_LUAD, LJI308_SKCM
GO:0051251	BP	positive regulation of lymphocyte activation	2	Telomerase Inhibitor IX_BRCA, Vinorelbine_LUAD
GO:0051281	BP	positive regulation of release of sequestered calcium ion into cytosol	2	Mitoxantrone_COREAD, 5-azacytidine_COREAD
GO:0051928	BP	positive regulation of calcium ion transport	2	776928_COREAD, LJI308_SKCM
GO:0051961	BP	negative regulation of nervous system development	2	Methotrexate_SKCM, AZD8055_LUAD
GO:0052547	BP	regulation of peptidase activity	2	Lenalidomide_ESCA, AZD8055_LUAD
GO:0052548	BP	regulation of endopeptidase activity	2	Lenalidomide_ESCA, Pyridostatin_SKCM
GO:0055074	BP	calcium ion homeostasis	2	Vinblastine_COREAD, 5-azacytidine_COREAD
GO:0060326	BP	cell chemotaxis	2	Axitinib_SCLC, Nutlin-3a (-)_SKCM
GO:0060415	BP	muscle tissue morphogenesis	2	MN-64_LUAD, Osimertinib_BRCA
GO:0060485	BP	mesenchyme development	2	Sepantronium bromide_SCLC, VE821_BRCA
GO:0060562	BP	epithelial tube morphogenesis	2	Sepantronium bromide_SCLC, VE821_BRCA
GO:0070665	BP	positive regulation of leukocyte proliferation	2	776928_COREAD, Mycophenolic acid_COREAD
GO:0071674	BP	mononuclear cell migration	2	Lenalidomide_ESCA, Axitinib_SCLC
GO:0071675	BP	regulation of mononuclear cell migration	2	Axitinib_SCLC, 776928_COREAD
GO:0071677	BP	positive regulation of mononuclear cell migration	2	Axitinib_SCLC, 776928_COREAD
GO:0071772	BP	response to BMP	2	Axitinib_SCLC, Sepantronium bromide_SCLC
GO:0071773	BP	cellular response to BMP stimulus	2	Axitinib_SCLC, Sepantronium bromide_SCLC
GO:0090090	BP	negative regulation of canonical Wnt signaling pathway	2	Staurosporine_BRCA, Osimertinib_BRCA
GO:0090092	BP	regulation of transmembrane receptor protein serine/threonine kinase signaling pathway	2	Axitinib_SCLC, Sepantronium bromide_SCLC
GO:0090287	BP	regulation of cellular response to growth factor stimulus	2	Axitinib_SCLC, Sepantronium bromide_SCLC
GO:0090288	BP	negative regulation of cellular response to growth factor stimulus	2	Axitinib_SCLC, Sepantronium bromide_SCLC
GO:0098586	BP	cellular response to virus	2	776928_COREAD, Vinorelbine_LUAD
GO:0099173	BP	postsynapse organization	2	Telomerase Inhibitor IX_BRCA, PFI-1_ESCA
GO:1903039	BP	positive regulation of leukocyte cell-cell adhesion	2	Telomerase Inhibitor IX_BRCA, Vinorelbine_LUAD
GO:1903169	BP	regulation of calcium ion transmembrane transport	2	Vinorelbine_LUAD, LJI308_SKCM
GO:1903531	BP	negative regulation of secretion by cell	2	Teniposide_LUAD, LJI308_SKCM
GO:2000401	BP	regulation of lymphocyte migration	2	Mitoxantrone_COREAD, 776928_COREAD
GO:2000403	BP	positive regulation of lymphocyte migration	2	Mitoxantrone_COREAD, 776928_COREAD
GO:2000404	BP	regulation of T cell migration	2	Mitoxantrone_COREAD, 776928_COREAD

## Sheet: all-condition
Supplementary Table S3C | GO entries enriched from high-frequency core gene sets that occur more than five times in all drug-cancer combinations
ID	ONTOLOGY	Description	Duplicate_Count	Conditions
GO:0005539	MF	glycosaminoglycan binding	7	Vinblastine_COREAD, Tanespimycin_COREAD, Tanespimycin_SKCM, Mitoxantrone_COREAD, Ulixertinib_COREAD, N25720-51-A1_COREAD, Vinorelbine_LUAD
GO:0030198	BP	extracellular matrix organization	7	Lestaurtinib_SCLC, Staurosporine_BRCA, Wee1 Inhibitor_BRCA, Nutlin-3a (-)_COREAD, Osimertinib_BRCA, Sepantronium bromide_SCLC, N25720-51-A1_COREAD
GO:0043062	BP	extracellular structure organization	7	Lestaurtinib_SCLC, Staurosporine_BRCA, Wee1 Inhibitor_BRCA, Nutlin-3a (-)_COREAD, Osimertinib_BRCA, Sepantronium bromide_SCLC, N25720-51-A1_COREAD
GO:0045229	BP	external encapsulating structure organization	7	Lestaurtinib_SCLC, Staurosporine_BRCA, Wee1 Inhibitor_BRCA, Nutlin-3a (-)_COREAD, Osimertinib_BRCA, Sepantronium bromide_SCLC, N25720-51-A1_COREAD
GO:0005125	MF	cytokine activity	6	Tanespimycin_COREAD, Irinotecan_OV, Teniposide_LUAD, Mitoxantrone_COREAD, Dactinomycin_COREAD, 776928_COREAD
GO:0042391	BP	regulation of membrane potential	5	Vinblastine_COREAD, Navitoclax_LUAD, Elephantin_ESCA, Buparlisib_COREAD, LJI308_SKCM
GO:0010720	BP	positive regulation of cell development	4	Obatoclax Mesylate_COREAD, MN-64_GBM, Vinorelbine_LUAD, VE821_BRCA
GO:0010818	BP	T cell chemotaxis	4	Mitoxantrone_COREAD, Dactinomycin_COREAD, 776928_COREAD, OF-1_SKCM
GO:0015849	BP	organic acid transport	4	AZD8055_LUAD, Dactinomycin_COREAD, Elephantin_ESCA, N25720-51-A1_COREAD
GO:0045177	CC	apical part of cell	4	Tanespimycin_SKCM, Nutlin-3a (-)_COREAD, AZD8055_LUAD, Elephantin_COREAD
GO:0046942	BP	carboxylic acid transport	4	AZD8055_LUAD, Dactinomycin_COREAD, Elephantin_ESCA, N25720-51-A1_COREAD
GO:0048738	BP	cardiac muscle tissue development	4	Veliparib_DLBC, MN-64_LUAD, Osimertinib_BRCA, Sepantronium bromide_SCLC
GO:0051580	BP	regulation of neurotransmitter uptake	4	Tanespimycin_LUAD, Staurosporine_BRCA, LJI308_SKCM, PFI-1_ESCA
GO:0051924	BP	regulation of calcium ion transport	4	Tanespimycin_LUAD, Dactinomycin_COREAD, Vinorelbine_LUAD, LJI308_SKCM
GO:0097060	CC	synaptic membrane	4	Selumetinib_SKCM, Elephantin_COREAD, N25720-51-A1_COREAD, CT7033-2_COREAD
GO:0002009	BP	morphogenesis of an epithelium	3	Osimertinib_BRCA, Sepantronium bromide_SCLC, VE821_BRCA
GO:0002237	BP	response to molecule of bacterial origin	3	Axitinib_SCLC, Mitoxantrone_COREAD, Vinorelbine_LUAD
GO:0002274	BP	myeloid leukocyte activation	3	Podophyllotoxin bromide_ESCA, Telomerase Inhibitor IX_BRCA, LJI308_SKCM
GO:0002444	BP	myeloid leukocyte mediated immunity	3	Axitinib_SCLC, Podophyllotoxin bromide_ESCA, Telomerase Inhibitor IX_BRCA
GO:0002548	BP	monocyte chemotaxis	3	Mitoxantrone_COREAD, 776928_COREAD, MG-132_COREAD
GO:0003205	BP	cardiac chamber development	3	MN-64_LUAD, Osimertinib_BRCA, Sepantronium bromide_SCLC
GO:0003206	BP	cardiac chamber morphogenesis	3	MN-64_LUAD, Osimertinib_BRCA, Sepantronium bromide_SCLC
GO:0005796	CC	Golgi lumen	3	Tanespimycin_SKCM, AZD8055_LUAD, AZD3759_LUAD
GO:0006813	BP	potassium ion transport	3	Tanespimycin_LUAD, Pyridostatin_SKCM, LJI308_SKCM
GO:0007188	BP	adenylate cyclase-modulating G protein-coupled receptor signaling pathway	3	Lestaurtinib_SCLC, LJI308_SKCM, VE821_BRCA
GO:0007389	BP	pattern specification process	3	Camptothecin_ESCA, Osimertinib_BRCA, Sepantronium bromide_SCLC
GO:0007411	BP	axon guidance	3	Lestaurtinib_SCLC, Sepantronium bromide_SCLC, CPI-637_COREAD
GO:0007517	BP	muscle organ development	3	MN-64_LUAD, Osimertinib_BRCA, Sepantronium bromide_SCLC
GO:0007611	BP	learning or memory	3	Elephantin_ESCA, LJI308_SKCM, PFI-1_ESCA
GO:0009615	BP	response to virus	3	Mitoxantrone_COREAD, MG-132_COREAD, Vinorelbine_LUAD
GO:0016324	CC	apical plasma membrane	3	Tanespimycin_SKCM, AZD8055_LUAD, Elephantin_COREAD
GO:0030178	BP	negative regulation of Wnt signaling pathway	3	Staurosporine_BRCA, Wee1 Inhibitor_BRCA, Osimertinib_BRCA
GO:0031069	BP	hair follicle morphogenesis	3	Docetaxel_LUAD, BI-2536_LUAD, Osimertinib_BRCA
GO:0032496	BP	response to lipopolysaccharide	3	Axitinib_SCLC, Mitoxantrone_COREAD, Vinorelbine_LUAD
GO:0043270	BP	positive regulation of monoatomic ion transport	3	Tanespimycin_LUAD, 776928_COREAD, LJI308_SKCM
GO:0045211	CC	postsynaptic membrane	3	AZD8055_LUAD, CT7033-2_COREAD, 5-azacytidine_LUAD
GO:0045785	BP	positive regulation of cell adhesion	3	Axitinib_SCLC, Nutlin-3a (-)_COREAD, VE821_BRCA
GO:0048608	BP	reproductive structure development	3	Axitinib_SCLC, MK-2206_COREAD, Sepantronium bromide_SCLC
GO:0048730	BP	epidermis morphogenesis	3	Docetaxel_LUAD, BI-2536_LUAD, Osimertinib_BRCA
GO:0050729	BP	positive regulation of inflammatory response	3	Lenalidomide_ESCA, Axitinib_SCLC, Vinorelbine_LUAD
GO:0050863	BP	regulation of T cell activation	3	Lenalidomide_ESCA, Telomerase Inhibitor IX_BRCA, Vinorelbine_LUAD
GO:0050900	BP	leukocyte migration	3	Camptothecin_ESCA, Lenalidomide_ESCA, Axitinib_SCLC
GO:0051279	BP	regulation of release of sequestered calcium ion into cytosol	3	Vinblastine_COREAD, Mitoxantrone_COREAD, 5-azacytidine_COREAD
GO:0055008	BP	cardiac muscle tissue morphogenesis	3	MN-64_LUAD, Osimertinib_BRCA, N25720-51-A1_COREAD
GO:0061458	BP	reproductive system development	3	Axitinib_SCLC, MK-2206_COREAD, Sepantronium bromide_SCLC
GO:0071219	BP	cellular response to molecule of bacterial origin	3	Axitinib_SCLC, Mitoxantrone_COREAD, Vinorelbine_LUAD
GO:0071222	BP	cellular response to lipopolysaccharide	3	Axitinib_SCLC, Mitoxantrone_COREAD, Vinorelbine_LUAD
GO:0072678	BP	T cell migration	3	Mitoxantrone_COREAD, Dactinomycin_COREAD, 776928_COREAD
GO:0090025	BP	regulation of monocyte chemotaxis	3	Mitoxantrone_COREAD, Dactinomycin_COREAD, 776928_COREAD
GO:0090026	BP	positive regulation of monocyte chemotaxis	3	Axitinib_SCLC, Mitoxantrone_COREAD, 776928_COREAD
GO:0097485	BP	neuron projection guidance	3	Lestaurtinib_SCLC, Sepantronium bromide_SCLC, CPI-637_COREAD
GO:1903037	BP	regulation of leukocyte cell-cell adhesion	3	Lenalidomide_ESCA, Telomerase Inhibitor IX_BRCA, Vinorelbine_LUAD
GO:2000406	BP	positive regulation of T cell migration	3	Mitoxantrone_COREAD, Dactinomycin_COREAD, 776928_COREAD
GO:0001906	BP	cell killing	2	Axitinib_SCLC, Telomerase Inhibitor IX_BRCA
GO:0001909	BP	leukocyte mediated cytotoxicity	2	Axitinib_SCLC, Telomerase Inhibitor IX_BRCA
GO:0002687	BP	positive regulation of leukocyte migration	2	Axitinib_SCLC, 776928_COREAD
GO:0002690	BP	positive regulation of leukocyte chemotaxis	2	Axitinib_SCLC, 776928_COREAD
GO:0002696	BP	positive regulation of leukocyte activation	2	Telomerase Inhibitor IX_BRCA, Vinorelbine_LUAD
GO:0003012	BP	muscle system process	2	Lestaurtinib_SCLC, MN-64_LUAD
GO:0003231	BP	cardiac ventricle development	2	MN-64_LUAD, VE821_BRCA
GO:0006816	BP	calcium ion transport	2	Vinorelbine_LUAD, LJI308_SKCM
GO:0006837	BP	serotonin transport	2	PLX-4720_SKCM, LJI308_SKCM
GO:0006936	BP	muscle contraction	2	Lestaurtinib_SCLC, MN-64_LUAD
GO:0007159	BP	leukocyte cell-cell adhesion	2	Lenalidomide_ESCA, Vinorelbine_LUAD
GO:0007189	BP	adenylate cyclase-activating G protein-coupled receptor signaling pathway	2	Lestaurtinib_SCLC, LJI308_SKCM
GO:0007409	BP	axonogenesis	2	N25720-51-A1_COREAD, CPI-637_COREAD
GO:0007565	BP	female pregnancy	2	AZD8055_LUAD, 5-azacytidine_COREAD
GO:0007613	BP	memory	2	Elephantin_ESCA, LJI308_SKCM
GO:0007632	BP	visual behavior	2	Navitoclax_LUAD, Nutlin-3a (-)_SKCM
GO:0008542	BP	visual learning	2	Navitoclax_LUAD, Nutlin-3a (-)_SKCM
GO:0009410	BP	response to xenobiotic stimulus	2	Wee1 Inhibitor_BRCA, AZD8055_LUAD
GO:0010959	BP	regulation of metal ion transport	2	Vinorelbine_LUAD, LJI308_SKCM
GO:0010975	BP	regulation of neuron projection development	2	Obatoclax Mesylate_COREAD, Osimertinib_BRCA
GO:0014820	BP	tonic smooth muscle contraction	2	PLX-4720_SKCM, POMHEX_COREAD
GO:0015844	BP	monoamine transport	2	Tanespimycin_LUAD, LJI308_SKCM
GO:0021988	BP	olfactory lobe development	2	Methotrexate_BRCA, 743380_BRCA
GO:0022409	BP	positive regulation of cell-cell adhesion	2	Telomerase Inhibitor IX_BRCA, Vinorelbine_LUAD
GO:0030509	BP	BMP signaling pathway	2	Axitinib_SCLC, Sepantronium bromide_SCLC
GO:0030510	BP	regulation of BMP signaling pathway	2	Axitinib_SCLC, Sepantronium bromide_SCLC
GO:0030595	BP	leukocyte chemotaxis	2	Axitinib_SCLC, Nutlin-3a (-)_SKCM
GO:0032102	BP	negative regulation of response to external stimulus	2	Lenalidomide_ESCA, Vinorelbine_LUAD
GO:0032946	BP	positive regulation of mononuclear cell proliferation	2	776928_COREAD, Mycophenolic acid_COREAD
GO:0034762	BP	regulation of transmembrane transport	2	Tanespimycin_LUAD, 5-azacytidine_COREAD
GO:0034765	BP	regulation of monoatomic ion transmembrane transport	2	Tanespimycin_LUAD, Vinorelbine_LUAD
GO:0042063	BP	gliogenesis	2	Staurosporine_BRCA, MK-2206_COREAD
GO:0042102	BP	positive regulation of T cell proliferation	2	776928_COREAD, Mycophenolic acid_COREAD
GO:0043269	BP	regulation of monoatomic ion transport	2	Tanespimycin_LUAD, LJI308_SKCM
GO:0043271	BP	negative regulation of monoatomic ion transport	2	Methotrexate_SKCM, LJI308_SKCM
GO:0043583	BP	ear development	2	Sepantronium bromide_SCLC, N25720-51-A1_COREAD
GO:0044703	BP	multi-organism reproductive process	2	AZD8055_LUAD, 5-azacytidine_COREAD
GO:0044706	BP	multi-multicellular organism process	2	AZD8055_LUAD, 5-azacytidine_COREAD
GO:0048644	BP	muscle organ morphogenesis	2	MN-64_LUAD, Osimertinib_BRCA
GO:0050671	BP	positive regulation of lymphocyte proliferation	2	776928_COREAD, Mycophenolic acid_COREAD
GO:0050727	BP	regulation of inflammatory response	2	Lenalidomide_ESCA, Vinorelbine_LUAD
GO:0050767	BP	regulation of neurogenesis	2	Osimertinib_BRCA, Sepantronium bromide_SCLC
GO:0050769	BP	positive regulation of neurogenesis	2	Osimertinib_BRCA, VE821_BRCA
GO:0050867	BP	positive regulation of cell activation	2	Telomerase Inhibitor IX_BRCA, Vinorelbine_LUAD
GO:0050870	BP	positive regulation of T cell activation	2	Telomerase Inhibitor IX_BRCA, Vinorelbine_LUAD
GO:0050890	BP	cognition	2	Navitoclax_LUAD, Elephantin_ESCA
GO:0051048	BP	negative regulation of secretion	2	Teniposide_LUAD, LJI308_SKCM
GO:0051251	BP	positive regulation of lymphocyte activation	2	Telomerase Inhibitor IX_BRCA, Vinorelbine_LUAD
GO:0051281	BP	positive regulation of release of sequestered calcium ion into cytosol	2	Mitoxantrone_COREAD, 5-azacytidine_COREAD
GO:0051928	BP	positive regulation of calcium ion transport	2	776928_COREAD, LJI308_SKCM
GO:0051961	BP	negative regulation of nervous system development	2	Methotrexate_SKCM, AZD8055_LUAD
GO:0052547	BP	regulation of peptidase activity	2	Lenalidomide_ESCA, AZD8055_LUAD
GO:0052548	BP	regulation of endopeptidase activity	2	Lenalidomide_ESCA, Pyridostatin_SKCM
GO:0055074	BP	calcium ion homeostasis	2	Vinblastine_COREAD, 5-azacytidine_COREAD
GO:0060326	BP	cell chemotaxis	2	Axitinib_SCLC, Nutlin-3a (-)_SKCM
GO:0060415	BP	muscle tissue morphogenesis	2	MN-64_LUAD, Osimertinib_BRCA
GO:0060485	BP	mesenchyme development	2	Sepantronium bromide_SCLC, VE821_BRCA
GO:0060562	BP	epithelial tube morphogenesis	2	Sepantronium bromide_SCLC, VE821_BRCA
GO:0070665	BP	positive regulation of leukocyte proliferation	2	776928_COREAD, Mycophenolic acid_COREAD
GO:0071674	BP	mononuclear cell migration	2	Lenalidomide_ESCA, Axitinib_SCLC
GO:0071675	BP	regulation of mononuclear cell migration	2	Axitinib_SCLC, 776928_COREAD
GO:0071677	BP	positive regulation of mononuclear cell migration	2	Axitinib_SCLC, 776928_COREAD
GO:0071772	BP	response to BMP	2	Axitinib_SCLC, Sepantronium bromide_SCLC
GO:0071773	BP	cellular response to BMP stimulus	2	Axitinib_SCLC, Sepantronium bromide_SCLC
GO:0090090	BP	negative regulation of canonical Wnt signaling pathway	2	Staurosporine_BRCA, Osimertinib_BRCA
GO:0090092	BP	regulation of transmembrane receptor protein serine/threonine kinase signaling pathway	2	Axitinib_SCLC, Sepantronium bromide_SCLC
GO:0090287	BP	regulation of cellular response to growth factor stimulus	2	Axitinib_SCLC, Sepantronium bromide_SCLC
GO:0090288	BP	negative regulation of cellular response to growth factor stimulus	2	Axitinib_SCLC, Sepantronium bromide_SCLC
GO:0098586	BP	cellular response to virus	2	776928_COREAD, Vinorelbine_LUAD
GO:0099173	BP	postsynapse organization	2	Telomerase Inhibitor IX_BRCA, PFI-1_ESCA
GO:1903039	BP	positive regulation of leukocyte cell-cell adhesion	2	Telomerase Inhibitor IX_BRCA, Vinorelbine_LUAD
GO:1903169	BP	regulation of calcium ion transmembrane transport	2	Vinorelbine_LUAD, LJI308_SKCM
GO:1903531	BP	negative regulation of secretion by cell	2	Teniposide_LUAD, LJI308_SKCM
GO:2000401	BP	regulation of lymphocyte migration	2	Mitoxantrone_COREAD, 776928_COREAD
GO:2000403	BP	positive regulation of lymphocyte migration	2	Mitoxantrone_COREAD, 776928_COREAD
GO:2000404	BP	regulation of T cell migration	2	Mitoxantrone_COREAD, 776928_COREAD
