# Supplementary material
Source: Research Square preprint supplement (doi:10.21203/rs.3.rs-9737821/v1)
Supplement: Supplementary file 3 [file e6412e0ad0743ae88c3ffdaa.xlsx]

## Sheet: Sheet1_Cancer
Supplementary Table S2a. Number of drug–cancer combinations per cancer type.

## Sheet: Sheet2_Drug
Supplementary Table S2b. Number of drug–cancer combinations per compound.
